# Supplementary material for: Femtosecond laser induced hierarchical ZnO superhydrophobic surfaces with switchable wettability
Source: Royal Society of Chemistry journal article supplement (doi:10.1039/c5cc02939b), 2015-01-01
Supplement: c5cc02939b1.pdf [file c5cc02939b1.pdf]

## Supporting Information

### Femtosecond Laser Induced Hierarchical ZnO Superhydrophobic Surfaces with Switchable Wettability

Jiale Yong, Feng Chen\*, Qing Yang\*, Yao Fang, Jinglan Huo and Xun Hou

Key Laboratory of Photonics Technology for Information of Shaanxi Province & State Key Laboratory for Manufacturing System Engineering, School of Electronics & Information Engineering, Xi'an Jiaotong University, Xi'an, 710049, P. R. China

\*Corresponding author: chenfeng@mail.xjtu.edu.cn (F. Chen)  
yangqing@mail.xjtu.edu.cn (Q. Yang)

(Including Figure S1~S3)

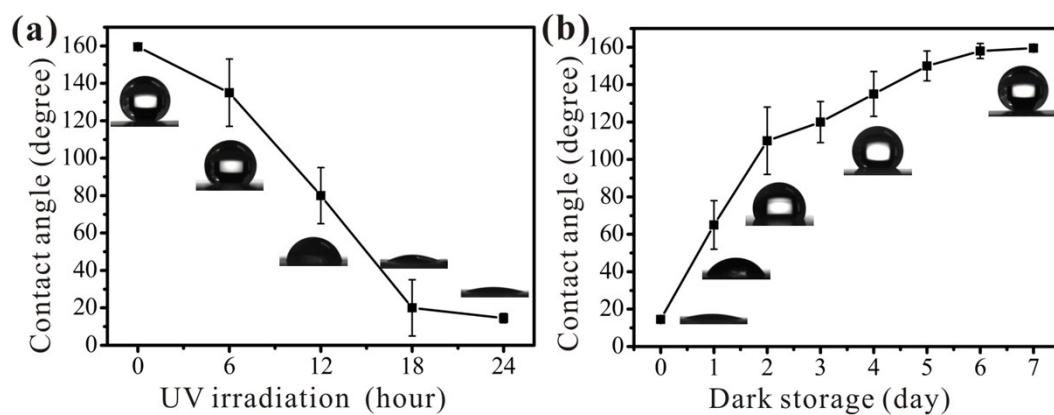

**Figure S1.** Relationships between the water contact angles of the femtosecond laser-induced rough ZnO surface and the UV irradiation time (a) as well as the dark storage time (b).

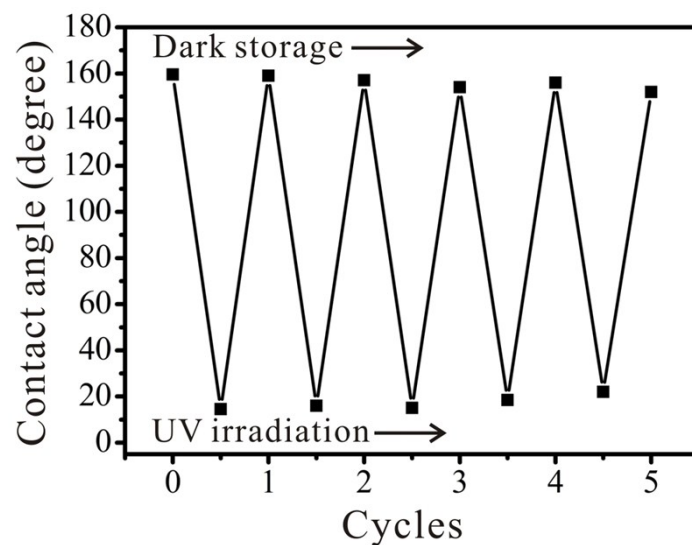

**Figure S2.** Reversibility of the wettability being switched between superhydrophobicity and quasi-superhydrophilicity.

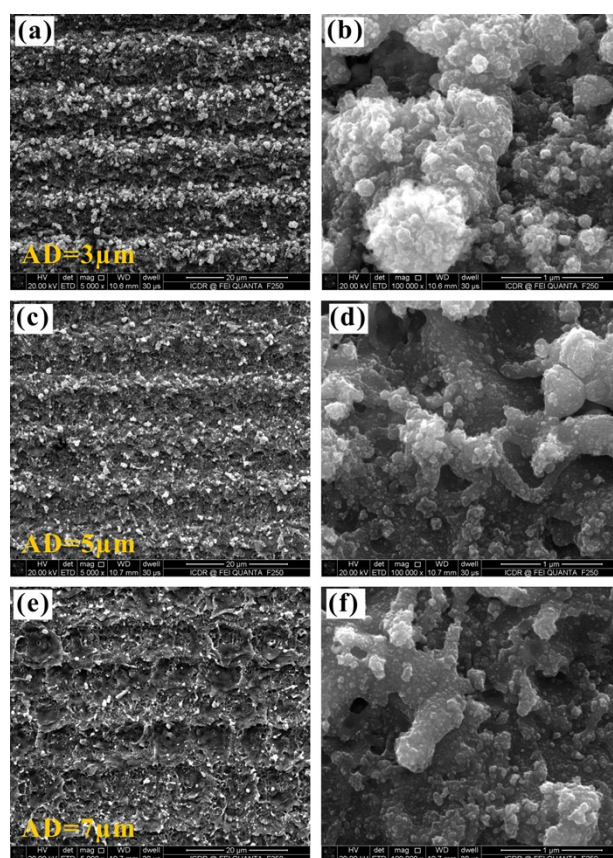

**Figure S3.** SEM images of Zn surface ablated by femtosecond laser at different average distance of laser pulse focus: (a,b) AD = 3  $\mu\text{m}$ , (c,d) AD = 5  $\mu\text{m}$ , and (e,f) AD = 7  $\mu\text{m}$ .
